# Supplementary material for: Lipidome Profiling in Childhood Obesity Compared to Adults: A Pilot Study
Source: MDPI journal article supplement (doi:10.3390/nu15153341), 2023-07-27
Supplement: s1 [file s1]

**Supplementary File S8.** Age- and sex-adjusted multivariate logistic regression analysis between circulating levels of significantly up and downregulated lipid species 6M-0M after lifestyle intervention and successful body mass index reduction (yes, n = 4; no: n= 6) in the pediatric (PE) cohort. Cox-Snell's  $R^2$  of the multiple regression models and p-value are shown. Associations were considered statistically significant for  $p < 0.05$ .

| Lipid species                                          | Cox-Snell $R^2$ | p-value |
|--------------------------------------------------------|-----------------|---------|
| DG 36:6; [M+H-H <sub>2</sub> O]1+                      | 0.215           | 0.572   |
| DG 44:9; [M+H-H <sub>2</sub> O]1+                      | 0.293           | 0.235   |
| PC 43:4; [M+H]1+                                       | 0.143           | 0.707   |
| PC-O 31:0; [M+H]1+ / PE-O 34:0; [M+H]1+                | 0.229           | 0.314   |
| PG 44:0; [M+H]1+                                       | 0.190           | 0.415   |
| PG-O 28:0; [M+H]1+                                     | 0.182           | 0.447   |
| PI-O 32:0; [M+H]1+                                     | 0.198           | 0.477   |
| PI-O 41:0; [M+H]1+                                     | 0.151           | 0.632   |
| PS 38:2; [M+Na]1+                                      | 0.131           | 0.945   |
| PS 38:4; [M+Na]1+                                      | 0.299           | 0.220   |
| PS 40:7; [M+H]1+ / PG 40:9; [M+NH <sub>4</sub> ]1+     | 0.289           | 0.199   |
| PS-O 34:0; [M+Na]1+                                    | 0.239           | 0.290   |
| PS-O 36:1; [M+Na]1+                                    | 0.242           | 0.380   |
| PS-O 36:2; [M+Na]1+                                    | 0.137           | 0.782   |
| PS-O 36:3; [M+H]1+ / PG-O 36:5; [M+NH <sub>4</sub> ]1+ | 0.248           | 0.282   |
| PS-O 36:3; [M+Na]1+                                    | 0.258           | 0.274   |
| PS-O 38:2; [M+Na]1+                                    | 0.590           | 0.241   |
| PS-O 38:4; [M+H]1+ / PG-O 38:6; [M+NH <sub>4</sub> ]1+ | 0.242           | 0.380   |
| PS-O 38:5; [M+H]1+ / PG-P 38:6; [M+NH <sub>4</sub> ]1+ | 0.137           | 0.782   |
| PS-O 38:5; [M+Na]1+                                    | 0.188           | 0.430   |
| PS-O 38:6; [M+H]1+                                     | 0.258           | 0.274   |
| PS-O 40:4; [M+Na]1+                                    | 0.349           | 0.285   |
| PS-O 40:6; [M+Na]1+                                    | 0.182           | 0.499   |
| PS-P 42:2; [M+H]1+                                     | 0.348           | 0.285   |
| SM 34:2; [M+H]1+                                       | 0.460           | 0.179   |
| SM 39:1; [M+H]1+                                       | 0.154           | 0.600   |
| SM 41:0; [M+H]1+                                       | 0.113           | 0.878   |
| TG 50:7; [M+NH <sub>4</sub> ]1+                        | 0.446           | 0.168   |
| TG 61:14; [M+NH <sub>4</sub> ]1+                       | 0.232           | 0.309   |
