# Supplementary material for: Lipidome Profiling in Childhood Obesity Compared to Adults: A Pilot Study
Source: MDPI journal article supplement (doi:10.3390/nu15153341), 2023-07-27
Supplement: s1 [file s1]

## **Lipidome profiling in childhood obesity compared to adults: a pilot study**

Andrea Soria-Gondek<sup>1\*</sup>, Pablo Fernández-García<sup>2\*</sup>, Lorena González<sup>3</sup>, Marjorie Reyes-Farias<sup>3,4</sup>, Marta Murillo<sup>5</sup>, Aina Valls<sup>5</sup>, Nativitat Real<sup>6</sup>, Silvia Pellitero<sup>7</sup>, Jordi Tarascó<sup>8</sup>, Benjamin Jenkins<sup>9</sup>, María Galán<sup>2</sup>, Francesc Villarroya<sup>10,11</sup>, Albert Koulman<sup>9</sup>, Patricia Corrales<sup>2</sup>, Antonio Vidal-Puig<sup>12†</sup>, Rubén Cereijo<sup>10,11, 13†</sup>, David Sánchez-Infantes<sup>2,3,11†</sup>

### **Contact info:**

David Sánchez-Infantes; Department of Health Sciences, Campus Alcorcón, University Rey Juan Carlos (URJC), E-28922 Madrid, Spain. Electronic address: david.sanchezi@urjc.es

### **Supplementary file S5**

**a. Adipokines and inflammatory biomarkers response to 6-month intervention in the PE cohort (upper row), the AD cohort (middle row) and the difference ( $\Delta$ , lower row) between 6M-0M.** Data shown are means  $\pm$  standard error of the mean (SEM). Paired samples Wilcoxon test was used to assess differences between 6M and 0M, while one-sample signed-rank test was used to assess differences from unaltered status (null hypothesis:  $\Delta=0$  units) in the lower panels compare TNF- $\alpha$  (tumor necrosis factor alfa), MCP1 (monocyte chemoattractant protein-1), IL-8 (interleukin-8) and IL-6 (interleukin-6). \*:  $p < 0.05$ , \*\*:  $p < 0.01$ , \*\*\*:  $p < 0.001$ , \*\*\*\*:  $p < 0.0001$ , 6M vs 0M. #:  $p < 0.05$ , ##:  $p < 0.01$ , ###:  $p < 0.001$ , vs  $\Delta=0$ .

**Correlation between adipokines, inflammatory and clinical biomarkers in the pediatric (b) and adult (c) cohorts.** Spearman's correlation was conducted for pre-intervention (0M), post-intervention (6M) and difference 6M-0M ( $\Delta$ ) for all variables. Pearson's correlation coefficient ( $\rho$ ), effective  $N$  used for each correlation and  $p$ -values (sig. bilateral) are shown for each correlation;  $p < 0.05$  was considered as the threshold of statistical significance and significant correlations were highlighted in green. BMI (body mass index), HOMA-IR (homeostatic model assessment insulin resistance), HbA1c (glycated hemoglobin), CRP (C reactive protein), TG (triglycerides), CHOL (cholesterol), HDL-c (high-density lipoprotein-cholesterol), LDL-c (low-density lipoprotein-

cholesterol, AST (aspartate aminotransferase), ALT (alanine aminotransferase), GGT (gamma-glutamyl transpeptidase).

**a. Adipokines and inflammatory biomarkers response to 6-month intervention in PE and AD cohort.**

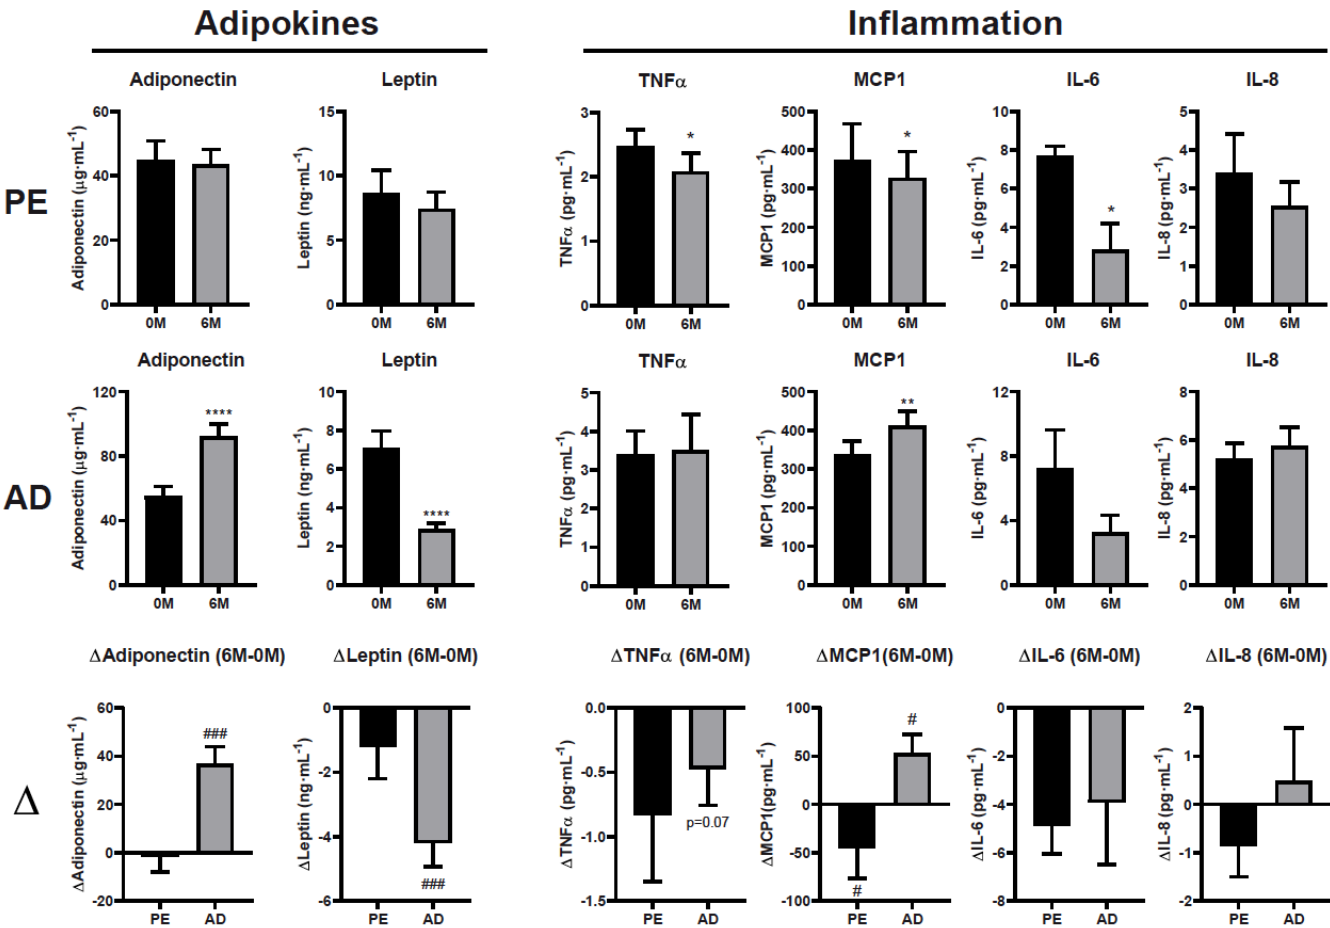

**b. Correlation between adipokines, inflammatory and clinical biomarkers. Pediatric cohort.**

|                     |                  | OM            |              |              |        |        |               | 6M           |        |              |        |        |               | Delta        |        |               |        |        |              |
|---------------------|------------------|---------------|--------------|--------------|--------|--------|---------------|--------------|--------|--------------|--------|--------|---------------|--------------|--------|---------------|--------|--------|--------------|
|                     |                  | Adiponectin   | Leptin       | TNF-a        | MCP1   | IL-6   | IL-8          | Adiponectin  | Leptin | TNF-a        | MCP1   | IL-6   | IL-8          | Adiponectin  | Leptin | TNF-a         | MCP1   | IL-6   | IL-8         |
| Adiponectin         | Spearman's rho   |               | -0.236       | -0.146       | 0.006  | -0.800 | 0.286         |              | 0.152  | <b>0.636</b> | -0.564 | -0.400 | 0.167         |              | -0.200 | -0.115        | -0.249 |        | -0.262       |
|                     | Sig. (bilateral) |               | 0.511        | 0.687        | 0.987  | 0.200  | 0.493         |              | 0.676  | <b>0.048</b> | 0.090  | 0.600  | 0.693         |              | 0.580  | 0.751         | 0.487  |        | 0.531        |
|                     | N                |               | 10           | 10           | 10     | 4      | 8             |              | 10     | <b>10</b>    | 10     | 4      | 8             |              | 10     | 10            | 10     |        | 8            |
| Leptin              | Spearman's rho   | -0.236        |              | 0.348        | 0.152  | 0.400  | 0.143         | 0.152        |        | 0.067        | -0.273 | -0.400 | 0.643         | -0.200       |        | -0.127        | 0.006  |        | 0.524        |
|                     | Sig. (bilateral) | 0.511         |              | 0.325        | 0.676  | 0.600  | 0.736         | 0.676        |        | 0.855        | 0.446  | 0.600  | 0.086         | 0.580        |        | 0.726         | 0.987  |        | 0.183        |
|                     | N                | 10            |              | 10           | 10     | 4      | 8             | 10           |        | 10           | 10     | 4      | 8             | 10           |        | 10            | 10     |        | 8            |
| TNF-a               | Spearman's rho   | -0.146        | 0.348        |              | -0.037 | 0.800  | -0.491        | <b>0.636</b> | 0.067  |              | -0.006 | 0.200  | -0.167        | -0.115       | -0.127 |               | 0.146  |        | -0.595       |
|                     | Sig. (bilateral) | 0.687         | 0.325        |              | 0.920  | 0.200  | 0.217         | <b>0.048</b> | 0.855  |              | 0.987  | 0.800  | 0.693         | 0.751        | 0.726  |               | 0.688  |        | 0.120        |
|                     | N                | 10            | 10           |              | 10     | 4      | 8             | <b>10</b>    | 10     |              | 10     | 4      | 8             | 10           | 10     |               | 10     |        | 8            |
| MCP1                | Spearman's rho   | 0.006         | 0.152        | -0.037       |        | 0.400  | 0.000         | -0.564       | -0.273 | -0.006       |        | 0.800  | -0.500        | -0.249       | 0.006  | 0.146         |        |        | -0.683       |
|                     | Sig. (bilateral) | 0.987         | 0.676        | 0.920        |        | 0.600  | 1.000         | 0.090        | 0.446  | 0.987        |        | 0.200  | 0.207         | 0.487        | 0.987  | 0.688         |        |        | 0.062        |
|                     | N                | 10            | 10           | 10           |        | 4      | 8             | 10           | 10     |              | 10     | 4      | 8             | 10           | 10     | 10            |        |        | 8            |
| IL6                 | Spearman's rho   | -0.800        | 0.400        | 0.800        | 0.400  |        | 0.400         | -0.400       | -0.400 | 0.200        | 0.800  |        | 0.500         |              |        |               |        |        |              |
|                     | Sig. (bilateral) | 0.200         | 0.600        | 0.200        | 0.600  |        | 0.600         | 0.600        | 0.600  | 0.800        | 0.200  |        | 0.667         |              |        |               |        |        |              |
|                     | N                | 4             | 4            | 4            | 4      |        | 4             | 4            | 4      | 4            | 4      |        | 3             |              |        |               |        |        |              |
| IL8                 | Spearman's rho   | 0.286         | 0.143        | -0.491       | 0.000  | 0.400  |               | 0.167        | 0.643  | -0.167       | -0.500 | 0.500  |               | -0.262       | 0.524  | -0.595        | -0.683 |        |              |
|                     | Sig. (bilateral) | 0.493         | 0.736        | 0.217        | 1.000  | 0.600  |               | 0.693        | 0.086  | 0.693        | 0.207  | 0.667  |               | 0.531        | 0.183  | 0.120         | 0.062  |        |              |
|                     | N                | 8             | 8            | 8            | 8      | 4      |               | 8            | 8      | 8            | 8      | 3      |               | 8            | 8      | 8             | 8      |        |              |
| Weight              | Spearman's rho   | -0.248        | 0.491        | 0.384        | 0.067  |        | -0.238        | -0.267       | 0.533  | -0.200       | -0.033 | 0.500  | 0.500         | -0.082       | 0.119  | -0.157        | 0.243  | -0.341 | -0.032       |
|                     | Sig. (bilateral) | 0.489         | 0.150        | 0.273        | 0.855  |        | 0.570         | 0.488        | 0.139  | 0.606        | 0.932  | 0.667  | 0.207         | 0.666        | 0.547  | 0.444         | 0.213  | 0.233  | 0.887        |
|                     | N                | 10            | 10           | 10           | 10     |        | 8             | 9            | 9      | 9            | 9      | 3      | 8             | 30           | 28     | 26            | 28     | 14     | 22           |
| BMI                 | Spearman's rho   | -0.164        | 0.612        | 0.311        | 0.261  | -0.200 | 0.190         | -0.450       | 0.483  | -0.033       | 0.200  | 0.500  | 0.643         | 0.113        | 0.165  | -0.174        | 0.004  | -0.024 | 0.041        |
|                     | Sig. (bilateral) | 0.651         | 0.060        | 0.382        | 0.467  | 0.800  | 0.651         | 0.224        | 0.187  | 0.932        | 0.606  | 0.667  | 0.086         | 0.553        | 0.402  | 0.395         | 0.982  | 0.935  | 0.855        |
|                     | N                | 10            | 10           | 10           | 10     | 4      | 8             | 9            | 9      | 9            | 9      | 3      | 8             | 30           | 28     | 26            | 28     | 14     | 22           |
| Waist Circumference | Spearman's rho   | <b>-0.775</b> | 0.685        | 0.482        | 0.144  | 0.738  | -0.116        | 0.143        | 0.600  | 0.371        | 0.314  |        | 0.425         | 0.022        | -0.054 | -0.195        | 0.211  | 0.182  | 0.270        |
|                     | Sig. (bilateral) | <b>0.041</b>  | 0.090        | 0.274        | 0.758  | 0.262  | 0.827         | 0.787        | 0.208  | 0.468        | 0.544  |        | 0.397         | 0.922        | 0.820  | 0.438         | 0.372  | 0.592  | 0.294        |
|                     | N                | <b>7</b>      | 7            | 7            | 7      | 4      | 6             | 6            | 6      | 6            | 6      |        | 6             | 22           | 20     | 18            | 20     | 11     | 17           |
| Insulin             | Spearman's rho   | -0.248        | 0.442        | <b>0.927</b> | -0.018 |        | -0.452        | -0.418       | 0.406  | -0.115       | 0.358  | 0.800  | 0.425         | -0.426       | 0.134  | 0.334         | 0.064  | 0.500  | -0.216       |
|                     | Sig. (bilateral) | 0.489         | 0.200        | <b>0.000</b> | 0.960  |        | 0.280         | 0.229        | 0.244  | 0.751        | 0.310  | 0.200  | 0.289         | 0.220        | 0.713  | 0.345         | 0.861  | 0.667  | 0.608        |
|                     | N                | 10            | 10           | <b>10</b>    | 10     |        | 8             | 10           | 10     | 10           | 10     | 4      | 8             | 10           | 10     | 10            | 10     | 3      | 8            |
| Glucose             | Spearman's rho   | -0.518        | 0.055        | 0.543        | -0.104 | 0.400  | <b>-0.790</b> | -0.036       | -0.188 | 0.182        | 0.024  | 0.200  | -0.012        | -0.463       | 0.616  | 0.140         | 0.180  |        | 0.422        |
|                     | Sig. (bilateral) | 0.125         | 0.880        | 0.105        | 0.776  | 0.600  | <b>0.020</b>  | 0.920        | 0.602  | 0.614        | 0.947  | 0.800  | 0.978         | 0.177        | 0.058  | 0.699         | 0.618  |        | 0.298        |
|                     | N                | 10            | 10           | 10           | 10     | 4      | <b>8</b>      | 10           | 10     | 10           | 10     | 4      | 8             | 10           | 10     | 10            | 10     |        | 8            |
| HOMA1R              | Spearman's rho   | -0.345        | 0.503        | <b>0.896</b> | 0.079  |        | -0.476        | -0.285       | 0.370  | 0.176        | 0.297  | 0.800  | 0.500         | -0.370       | 0.297  | 0.358         | 0.274  | 0.500  | -0.238       |
|                     | Sig. (bilateral) | 0.328         | 0.138        | <b>0.000</b> | 0.829  |        | 0.233         | 0.425        | 0.293  | 0.627        | 0.405  | 0.200  | 0.207         | 0.293        | 0.405  | 0.310         | 0.444  | 0.667  | 0.570        |
|                     | N                | 10            | 10           | <b>10</b>    | 10     |        | <b>8</b>      | 10           | 10     | 10           | 10     | 4      | 8             | 10           | 10     | 10            | 10     | 3      | 8            |
| HbA1c               | Spearman's rho   | 0.301         | -0.408       | -0.060       | 0.125  | 0.316  | -0.398        | -0.325       | 0.188  | -0.375       | -0.069 | -0.316 | 0.049         | -0.056       | 0.477  | <b>-0.646</b> | -0.604 |        | <b>0.756</b> |
|                     | Sig. (bilateral) | 0.398         | 0.242        | 0.869        | 0.730  | 0.684  | 0.329         | 0.359        | 0.604  | 0.285        | 0.850  | 0.684  | 0.909         | 0.877        | 0.164  | <b>0.044</b>  | 0.064  |        | <b>0.030</b> |
|                     | N                | 10            | 10           | 10           | 10     | 4      | <b>8</b>      | 10           | 10     | 10           | 10     | 4      | 8             | 10           | 10     | <b>10</b>     | 10     |        | <b>8</b>     |
| TG                  | Spearman's rho   | 0.049         | <b>0.644</b> | <b>0.771</b> | 0.061  | 0.200  | -0.310        | 0.492        | 0.620  | <b>0.657</b> | -0.176 | -0.400 | 0.286         | 0.042        | 0.127  | <b>0.794</b>  | -0.079 | 0.500  | -0.381       |
|                     | Sig. (bilateral) | 0.894         | <b>0.044</b> | <b>0.009</b> | 0.868  | 0.800  | 0.456         | 0.148        | 0.056  | <b>0.039</b> | 0.626  | 0.600  | 0.493         | 0.907        | 0.726  | <b>0.006</b>  | 0.828  | 0.667  | 0.352        |
|                     | N                | 10            | <b>10</b>    | <b>10</b>    | 10     | 4      | <b>8</b>      | 10           | 10     | <b>10</b>    | 10     | 4      | 8             | 10           | 10     | <b>10</b>     | 10     | 3      | 8            |
| Chol                | Spearman's rho   | 0.237         | 0.188        | 0.187        | 0.347  | -0.400 | -0.500        | 0.164        | 0.091  | 0.539        | 0.406  | -0.400 | -0.571        |              |        |               |        |        |              |
|                     | Sig. (bilateral) | 0.510         | 0.602        | 0.606        | 0.327  | 0.600  | 0.207         | 0.651        | 0.803  | 0.108        | 0.244  | 0.600  | 0.139         |              |        |               |        |        |              |
|                     | N                | 10            | 10           | 10           | 10     | 4      | <b>8</b>      | 10           | 10     | 10           | 10     | 4      | 8             |              |        |               |        |        |              |
| HDL                 | Spearman's rho   | -0.065        | -0.006       | -0.110       | 0.321  | -0.400 | -0.238        | 0.065        | -0.091 | 0.224        | 0.164  | -0.400 | <b>-0.857</b> | <b>0.760</b> | -0.109 | -0.231        | 0.012  |        | -0.452       |
|                     | Sig. (bilateral) | 0.881         | 0.987        | 0.763        | 0.365  | 0.600  | 0.570         | 0.881        | 0.803  | 0.533        | 0.651  | 0.600  | <b>0.007</b>  | <b>0.011</b> | 0.763  | 0.521         | 0.973  |        | 0.260        |
|                     | N                | 10            | 10           | 10           | 10     | 4      | <b>8</b>      | 10           | 10     | 10           | 10     | 4      | <b>8</b>      | <b>10</b>    | 10     | 10            | 10     |        | 8            |
| LDL                 | Spearman's rho   | 0.049         | 0.158        | 0.006        | 0.584  | 0.200  | -0.143        | 0.109        | -0.049 | 0.450        | 0.365  | 0.200  | -0.476        | 0.359        | -0.018 | <b>-0.723</b> | -0.256 | 0.500  | 0.405        |
|                     | Sig. (bilateral) | 0.894         | 0.663        | 0.987        | 0.077  | 0.800  | 0.736         | 0.763        | 0.894  | 0.192        | 0.300  | 0.800  | 0.233         | 0.309        | 0.960  | <b>0.018</b>  | 0.475  | 0.667  | 0.320        |
|                     | N                | 10            | 10           | 10           | 10     | 4      | <b>8</b>      | 10           | 10     | 10           | 10     | 4      | 8             | 10           | 10     | <b>10</b>     | 10     | 3      | 8            |
| Urea                | Spearman's rho   | 0.213         | 0.055        | 0.303        | 0.395  | 0.800  | 0.144         | 0.328        | -0.091 | 0.225        | -0.219 | -1.000 | -0.611        |              |        |               |        |        |              |
|                     | Sig. (bilateral) | 0.555         | 0.881        | 0.395        | 0.258  | 0.200  | 0.734         | 0.354        | 0.802  | 0.532        | 0.544  |        | 0.108         |              |        |               |        |        |              |
|                     | N                | 10            | 10           | 10           | 10     | 4      | <b>8</b>      | 10           | 10     | 10           | 10     | 4      | 8             |              |        |               |        |        |              |
| Creatinine          | Spearman's rho   | -0.055        | 0.127        | -0.030       | 0.358  | 0.200  | -0.452        | -0.024       | 0.036  | 0.043        | 0.304  | -0.800 | -0.475        |              |        |               |        |        |              |
|                     | Sig. (bilateral) | 0.881         | 0.726        | 0.933        | 0.310  | 0.800  | 0.260         | 0.947        | 0.920  | 0.907        | 0.393  | 0.200  | 0.230         |              |        |               |        |        |              |
|                     | N                | 10            | 10           | 10           | 10     | 4      | <b>8</b>      | 10           | 10     | 10           | 10     | 4      | 8             |              |        |               |        |        |              |
| AST                 | Spearman's rho   | 0.192         | -0.201       | 0.165        | 0.351  |        | <b>-0.786</b> |              |        |              |        |        |               |              |        |               |        |        |              |
|                     | Sig. (bilateral) | 0.620         | 0.604        | 0.672        | 0.354  |        | <b>0.036</b>  |              |        |              |        |        |               |              |        |               |        |        |              |
|                     | N                | 9             | 9            | 9            | 9      |        | <b>7</b>      |              |        |              |        |        |               |              |        |               |        |        |              |
| ALT                 | Spearman's rho   | -0.164        | -0.316       | 0.217        | 0.109  | 0.105  | <b>-0.802</b> | 0.059        | 0.151  | 0.050        | 0.286  | -0.949 | -0.703        |              |        |               |        |        |              |
|                     | Sig. (bilateral) | 0.650         | 0.374        | 0.547        | 0.763  | 0.895  | <b>0.017</b>  | 0.881        | 0.698  | 0.897        | 0.456  | 0.051  | 0.078         |              |        |               |        |        |              |
|                     | N                | 10            | 10           | 10           | 10     | 4      | <b>8</b>      | 9            | 9      | 9            | 9      | 4      | 7             |              |        |               |        |        |              |

### c. Correlation between adipokines, inflammatory and clinical biomarkers. Adult cohort.

|                     |                  | OM          |        |               |        |        |        | 6M          |        |               |        |        |        | Delta       |        |               |        |        |        |
|---------------------|------------------|-------------|--------|---------------|--------|--------|--------|-------------|--------|---------------|--------|--------|--------|-------------|--------|---------------|--------|--------|--------|
|                     |                  | Adiponectin | Leptin | TNF- $\alpha$ | MCP1   | IL-6   | IL-8   | Adiponectin | Leptin | TNF- $\alpha$ | MCP1   | IL-6   | IL-8   | Adiponectin | Leptin | TNF- $\alpha$ | MCP1   | IL-6   | IL-8   |
| Adiponectin         | Spearman's rho   |             | 0,212  | 0,203         | 0,239  | 0,586  | 0,172  |             | 0,008  | 0,420         | 0,365  | 0,049  | 0,549  |             | -0,006 | -0,226        | 0,048  | 0,055  | 0,296  |
|                     | Sig. (bilateral) |             | 0,279  | 0,319         | 0,220  | 0,008  | 0,412  |             | 0,967  | 0,033         | 0,056  | 0,848  | 0,008  |             | 0,976  | 0,268         | 0,809  | 0,852  | 0,180  |
|                     | N                |             | 28     | 26            | 28     | 19     | 25     |             | 28     | 26            | 28     | 18     | 22     |             | 28     | 26            | 28     | 14     | 22     |
| Leptin              | Spearman's rho   | 0,212       |        | 0,171         | 0,274  | 0,134  | 0,067  | 0,008       |        | -0,129        | 0,048  | -0,101 | 0,082  | -0,006      |        | 0,014         | 0,032  | 0,103  | -0,181 |
|                     | Sig. (bilateral) | 0,279       |        | 0,403         | 0,159  | 0,584  | 0,751  | 0,967       |        | 0,531         | 0,810  | 0,690  | 0,717  | 0,976       |        | 0,946         | 0,873  | 0,725  | 0,420  |
|                     | N                | 28          |        | 26            | 28     | 19     | 25     | 28          |        | 26            | 28     | 18     | 22     | 28          |        | 26            | 28     | 14     | 22     |
| TNF- $\alpha$       | Spearman's rho   | 0,203       | 0,171  |               | 0,796  | 0,371  | 0,238  | 0,420       | -0,129 |               | 0,554  | 0,214  | 0,372  | -0,226      | 0,014  |               | 0,178  | 0,191  | -0,238 |
|                     | Sig. (bilateral) | 0,319       | 0,403  |               | 0,000  | 0,130  | 0,274  | 0,033       | 0,531  |               | 0,003  | 0,394  | 0,097  | 0,268       | 0,946  |               | 0,385  | 0,513  | 0,311  |
|                     | N                | 26          | 26     |               | 26     | 18     | 23     | 26          | 26     |               | 26     | 18     | 21     | 26          | 26     |               | 26     | 14     | 20     |
| MCP1                | Spearman's rho   | 0,239       | 0,274  | 0,796         |        | 0,306  | 0,248  | 0,365       | 0,048  | 0,554         |        | -0,225 | 0,332  | 0,048       | 0,032  | 0,178         |        | -0,011 | 0,495  |
|                     | Sig. (bilateral) | 0,220       | 0,159  | 0,000         |        | 0,203  | 0,233  | 0,056       | 0,810  | 0,003         |        | 0,369  | 0,131  | 0,809       | 0,873  | 0,385         |        | 0,970  | 0,019  |
|                     | N                | 28          | 28     | 26            |        | 19     | 25     | 28          | 28     | 26            |        | 18     | 22     | 28          | 28     | 26            |        | 14     | 22     |
| IL6                 | Spearman's rho   | 0,451       | 0,134  | 0,371         | 0,306  |        | 0,579  | 0,049       | -0,101 | 0,214         | -0,225 |        | 0,473  | 0,055       | 0,103  | 0,191         | -0,011 |        | 0,287  |
|                     | Sig. (bilateral) | 0,053       | 0,584  | 0,130         | 0,203  |        | 0,015  | 0,848       | 0,690  | 0,394         | 0,369  |        | 0,103  | 0,852       | 0,725  | 0,513         | 0,970  |        | 0,366  |
|                     | N                | 19          | 19     | 18            | 19     |        | 17     | 18          | 18     | 18            | 18     |        | 13     | 14          | 14     | 14            | 14     |        | 12     |
| IL8                 | Spearman's rho   | 0,172       | 0,067  | 0,238         | 0,248  | 0,395  |        | 0,549       | 0,082  | 0,372         | 0,332  | 0,473  |        | 0,296       | -0,181 | -0,238        | 0,495  | 0,287  |        |
|                     | Sig. (bilateral) | 0,412       | 0,751  | 0,274         | 0,233  | 0,117  |        | 0,008       | 0,717  | 0,097         | 0,131  | 0,103  |        | 0,180       | 0,420  | 0,311         | 0,019  | 0,366  |        |
|                     | N                | 25          | 25     | 23            | 25     | 17     |        | 22          | 22     | 21            | 22     | 13     |        | 22          | 22     | 20            | 22     | 12     |        |
| Height              | Spearman's rho   | -0,233      | -0,022 | 0,387         | 0,439  | 0,082  | 0,256  | -0,281      | -0,333 | 0,181         | 0,160  | 0,382  | -0,128 |             |        |               |        |        |        |
|                     | Sig. (bilateral) | 0,215       | 0,911  | 0,051         | 0,020  | 0,739  | 0,216  | 0,132       | 0,084  | 0,376         | 0,415  | 0,118  | 0,571  |             |        |               |        |        |        |
|                     | N                | 30          | 28     | 26            | 28     | 19     | 25     | 30          | 28     | 26            | 28     | 18     | 22     |             |        |               |        |        |        |
| Weight              | Spearman's rho   | -0,077      | 0,292  | 0,388         | 0,468  | 0,375  | 0,204  | -0,043      | 0,470  | -0,031        | 0,078  | 0,105  | -0,188 | -0,082      | 0,119  | -0,157        | 0,243  | -0,341 | -0,032 |
|                     | Sig. (bilateral) | 0,688       | 0,132  | 0,050         | 0,012  | 0,114  | 0,327  | 0,820       | 0,012  | 0,879         | 0,692  | 0,677  | 0,402  | 0,666       | 0,547  | 0,444         | 0,213  | 0,233  | 0,887  |
|                     | N                | 30          | 28     | 26            | 28     | 19     | 25     | 30          | 28     | 26            | 28     | 18     | 22     | 30          | 28     | 26            | 28     | 14     | 22     |
| BMI                 | Spearman's rho   | 0,072       | 0,385  | 0,179         | 0,189  | 0,203  | -0,127 | -0,420      | 0,043  | -0,221        | -0,298 | 0,068  | -0,472 | 0,113       | 0,165  | -0,174        | 0,004  | -0,024 | 0,041  |
|                     | Sig. (bilateral) | 0,706       | 0,043  | 0,382         | 0,334  | 0,405  | 0,545  | 0,021       | 0,829  | 0,278         | 0,124  | 0,788  | 0,027  | 0,553       | 0,402  | 0,395         | 0,982  | 0,935  | 0,855  |
|                     | N                | 30          | 28     | 26            | 28     | 19     | 25     | 30          | 28     | 26            | 28     | 18     | 22     | 30          | 28     | 26            | 28     | 14     | 22     |
| Waist Circumference | Spearman's rho   | -0,204      | 0,252  | 0,477         | 0,600  | -0,125 | 0,133  | -0,450      | 0,015  | -0,323        | -0,335 | 0,197  | -0,405 | 0,022       | -0,054 | -0,195        | 0,211  | 0,182  | 0,270  |
|                     | Sig. (bilateral) | 0,328       | 0,246  | 0,029         | 0,002  | 0,644  | 0,565  | 0,013       | 0,941  | 0,108         | 0,081  | 0,433  | 0,062  | 0,922       | 0,820  | 0,438         | 0,372  | 0,592  | 0,294  |
|                     | N                | 25          | 23     | 21            | 23     | 16     | 21     | 30          | 28     | 26            | 28     | 18     | 22     | 22          | 20     | 18            | 20     | 11     | 17     |
| Insulin             | Spearman's rho   | -0,202      | -0,191 | -0,012        | -0,073 | -0,091 | -0,265 | -0,034      | -0,001 | -0,315        | -0,112 | -0,320 | 0,147  | 0,119       | -0,035 | 0,062         | -0,127 | -0,271 | -0,425 |
|                     | Sig. (bilateral) | 0,284       | 0,332  | 0,954         | 0,713  | 0,710  | 0,200  | 0,859       | 0,997  | 0,117         | 0,571  | 0,196  | 0,514  | 0,548       | 0,864  | 0,768         | 0,526  | 0,349  | 0,125  |
|                     | N                | 30          | 28     | 26            | 28     | 19     | 25     | 30          | 28     | 26            | 28     | 18     | 22     | 28          | 27     | 25            | 27     | 14     | 22     |
| Glucose             | Spearman's rho   | -0,141      | 0,031  | 0,061         | 0,095  | -0,304 | -0,568 | 0,276       | -0,202 | -0,046        | -0,032 | -0,599 | -0,218 | 0,015       | 0,369  | -0,085        | -0,243 | -0,029 | -0,249 |
|                     | Sig. (bilateral) | 0,456       | 0,874  | 0,767         | 0,631  | 0,205  | 0,003  | 0,139       | 0,303  | 0,824         | 0,871  | 0,009  | 0,330  | 0,938       | 0,058  | 0,681         | 0,223  | 0,922  | 0,276  |
|                     | N                | 30          | 28     | 26            | 28     | 19     | 25     | 30          | 28     | 26            | 28     | 18     | 22     | 28          | 27     | 26            | 27     | 14     | 21     |
| HOMA1r              | Spearman's rho   | -0,204      | -0,211 | -0,013        | -0,042 | -0,121 | -0,299 | 0,340       | -0,300 | 0,181         | 0,155  | -0,084 | 0,224  | 0,084       | -0,073 | 0,124         | -0,106 | -0,361 | -0,411 |
|                     | Sig. (bilateral) | 0,280       | 0,280  | 0,951         | 0,830  | 0,621  | 0,146  | 0,066       | 0,120  | 0,376         | 0,432  | 0,740  | 0,316  | 0,667       | 0,713  | 0,547         | 0,591  | 0,205  | 0,057  |
|                     | N                | 30          | 28     | 26            | 28     | 19     | 25     | 30          | 28     | 26            | 28     | 18     | 22     | 29          | 28     | 26            | 28     | 14     | 22     |
| HbA1c               | Spearman's rho   | -0,185      | -0,036 | 0,025         | 0,003  | -0,180 | -0,099 | -0,523      | -0,084 | -0,242        | -0,276 | 0,284  | -0,405 | -0,048      | 0,079  | -0,084        | -0,019 | 0,399  | 0,037  |
|                     | Sig. (bilateral) | 0,336       | 0,857  | 0,905         | 0,989  | 0,462  | 0,638  | 0,003       | 0,671  | 0,234         | 0,155  | 0,253  | 0,061  | 0,814       | 0,709  | 0,703         | 0,930  | 0,158  | 0,873  |
|                     | N                | 29          | 27     | 25            | 27     | 19     | 25     | 30          | 28     | 26            | 28     | 18     | 22     | 27          | 25     | 23            | 25     | 14     | 21     |
| CRP                 | Spearman's rho   | -0,096      | 0,376  | 0,023         | 0,485  | 0,054  | -0,055 | -0,096      | 0,376  | 0,023         | 0,485  | 0,054  | -0,055 | 0,238       | 0,100  | -0,259        | -0,185 | 0,515  | 0,215  |
|                     | Sig. (bilateral) | 0,613       | 0,049  | 0,913         | 0,009  | 0,828  | 0,794  | 0,613       | 0,049  | 0,913         | 0,009  | 0,828  | 0,794  | 0,252       | 0,649  | 0,258         | 0,397  | 0,087  | 0,362  |
|                     | N                | 30          | 28     | 26            | 28     | 19     | 25     | 30          | 28     | 26            | 28     | 19     | 25     | 25          | 23     | 21            | 23     | 12     | 20     |
| TG                  | Spearman's rho   | -0,264      | -0,111 | 0,245         | 0,089  | -0,171 | 0,008  | 0,331       | 0,028  | 0,097         | 0,447  | 0,034  | 0,391  | -0,041      | -0,175 | 0,425         | 0,251  | -0,061 | -0,019 |
|                     | Sig. (bilateral) | 0,158       | 0,575  | 0,228         | 0,653  | 0,483  | 0,968  | 0,074       | 0,889  | 0,638         | 0,017  | 0,893  | 0,072  | 0,831       | 0,382  | 0,034         | 0,207  | 0,844  | 0,935  |
|                     | N                | 30          | 28     | 26            | 28     | 19     | 25     | 30          | 28     | 26            | 28     | 18     | 22     | 29          | 27     | 25            | 27     | 13     | 21     |
| Chol                | Spearman's rho   | 0,186       | 0,279  | -0,042        | -0,041 | -0,215 | 0,038  | -0,079      | 0,148  | 0,312         | 0,079  | 0,340  | 0,125  |             |        |               |        |        |        |
|                     | Sig. (bilateral) | 0,325       | 0,151  | 0,838         | 0,835  | 0,376  | 0,858  | 0,678       | 0,452  | 0,120         | 0,691  | 0,167  | 0,578  |             |        |               |        |        |        |
|                     | N                | 30          | 28     | 26            | 28     | 19     | 25     | 30          | 28     | 26            | 28     | 18     | 22     |             |        |               |        |        |        |
| HDL                 | Spearman's rho   | 0,433       | 0,150  | -0,085        | -0,046 | 0,219  | 0,098  | 0,432       | -0,029 | -0,372        | -0,128 | 0,062  | -0,372 | 0,200       | 0,264  | -0,278        | 0,013  | 0,108  | -0,038 |
|                     | Sig. (bilateral) | 0,017       | 0,447  | 0,680         | 0,817  | 0,367  | 0,641  | 0,017       | 0,885  | 0,061         | 0,517  | 0,807  | 0,088  | 0,299       | 0,183  | 0,179         | 0,949  | 0,714  | 0,871  |
|                     | N                | 30          | 28     | 26            | 28     | 19     | 25     | 30          | 28     | 26            | 28     | 18     | 22     | 29          | 27     | 25            | 27     | 14     | 21     |
| LDL                 | Spearman's rho   | 0,076       | 0,312  | -0,196        | -0,261 | -0,238 | 0,002  | 0,061       | 0,221  | 0,177         | 0,157  | 0,246  | 0,125  | 0,033       | 0,077  | -0,101        | 0,024  | -0,055 | 0,313  |
|                     | Sig. (bilateral) | 0,691       | 0,106  | 0,336         | 0,180  | 0,327  | 0,994  | 0,781       | 0,336  | 0,468         | 0,496  | 0,396  | 0,657  | 0,863       | 0,698  | 0,622         | 0,904  | 0,852  | 0,156  |
|                     | N                | 30          | 28     | 26            | 28     | 19     | 25     | 23          | 21     | 19            | 21     | 14     | 15     | 30          | 28     | 26            | 28     | 14     | 22     |
| Urea                | Spearman's rho   | 0,065       | 0,007  | 0,004         | -0,227 | -0,215 | -0,209 | 0,530       | 0,054  | 0,195         | 0,232  | -0,227 | 0,427  |             |        |               |        |        |        |
|                     | Sig. (bilateral) | 0,734       | 0,972  | 0,983         | 0,245  | 0,378  | 0,316  | 0,003       | 0,785  | 0,340         | 0,235  | 0,364  | 0,047  |             |        |               |        |        |        |
|                     | N                | 30          | 28     | 26            | 28     | 19     | 25     | 30          | 28     | 26            | 28     | 18     | 22     |             |        |               |        |        |        |
| Creatinine          | Spearman's rho   | 0,007       | -0,016 | 0,272         | 0,062  | 0,048  | 0,412  | -0,028      |        |               |        |        |        |             |        |               |        |        |        |
