# Supplementary material for: Lipidome Profiling in Childhood Obesity Compared to Adults: A Pilot Study
Source: MDPI journal article supplement (doi:10.3390/nu15153341), 2023-07-27
Supplement: s1 [file s1]

## Lipidome profiling in childhood obesity compared to adults: a pilot study

Andrea Soria-Gondek<sup>1\*</sup>, Pablo Fernández-García<sup>2\*</sup>, Lorena González<sup>3</sup>, Marjorie Reyes-Farias<sup>3,4</sup>, Marta Murillo<sup>5</sup>, Aina Valls<sup>5</sup>, Nativitat Real<sup>6</sup>, Silvia Pellitero<sup>7</sup>, Jordi Tarascó<sup>8</sup>, Benjamin Jenkins<sup>9</sup>, María Galán<sup>2</sup>, Francesc Villarroya<sup>10,11</sup>, Albert Koulman<sup>9</sup>, Patricia Corrales<sup>2</sup>, Antonio Vidal-Puig<sup>12†</sup>, Rubén Cereijo<sup>10,11, 13†</sup>, David Sánchez-Infantes<sup>2,3,11†</sup>

### Contact info:

David Sánchez-Infantes; Department of Health Sciences, Campus Alcorcón, University Rey Juan Carlos (URJC), E-28922 Madrid, Spain. Electronic address: david.sanchezi@urjc.es

### Supplementary file S2

Study flowchart. Inclusion/exclusion criteria, study protocol and follow-up.

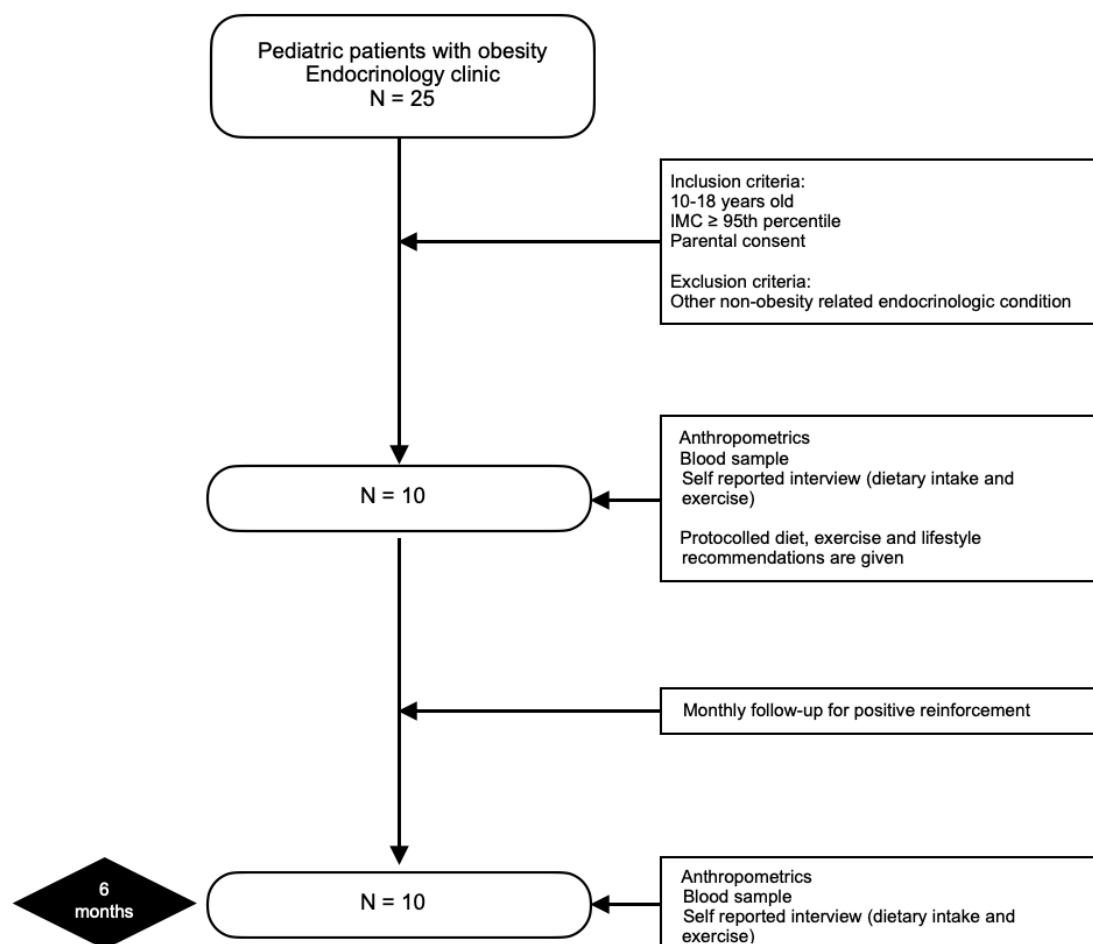

a. Pediatric group

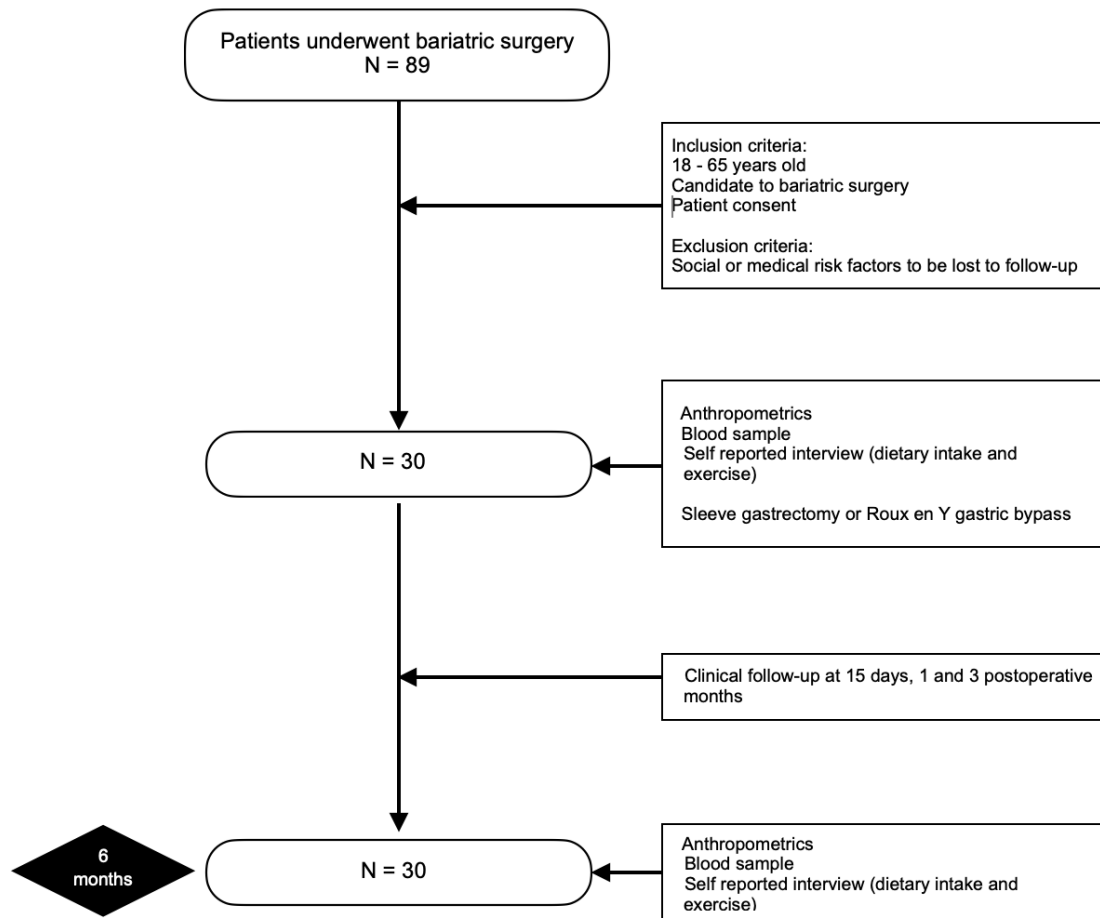

b. Adult group
