# Supplementary material for: Lipidome Profiling in Childhood Obesity Compared to Adults: A Pilot Study
Source: MDPI journal article supplement (doi:10.3390/nu15153341), 2023-07-27
Supplement: s1 [file s1]

## **Lipidome profiling in childhood obesity compared to adults: a pilot study**

Andrea Soria-Gondek<sup>1\*</sup>, Pablo Fernández-García<sup>2\*</sup>, Lorena González<sup>3</sup>, Marjorie Reyes-Farias<sup>3,4</sup>, Marta Murillo<sup>5</sup>, Aina Valls<sup>5</sup>, Nativitat Real<sup>6</sup>, Silvia Pellitero<sup>7</sup>, Jordi Tarascó<sup>8</sup>, Benjamin Jenkins<sup>9</sup>, María Galán<sup>2</sup>, Francesc Villarroya<sup>10,11</sup>, Albert Koulman<sup>9</sup>, Patricia Corrales<sup>2</sup>, Antonio Vidal-Puig<sup>12†</sup>, Rubén Cereijo<sup>10,11, 13†</sup>, David Sánchez-Infantes<sup>2,3,11†</sup>

### **Contact info:**

David Sánchez-Infantes; Department of Health Sciences, Campus Alcorcón, University Rey Juan Carlos (URJC), E-28922 Madrid, Spain. Electronic address: david.sanchezi@urjc.es

**Supplementary file S7.** Statistically significant correlations between the fatty liver index (FLI) and detectable diacylglycerols (DG) before (0M) and after (6M) 6 months of intervention in the pediatric (PE) and adult (AD) cohorts. Statistically significant correlations (Spearman's rho  $p$ -value < 0.05) are indicated in bold.

|                         | FLI 0M        |              | FLI 6M        |                  |
|-------------------------|---------------|--------------|---------------|------------------|
|                         | Rho           | $p$ -value   | Rho           | $p$ -value       |
| PE                      |               |              |               |                  |
| DG (36:3); [M+NH4]1+    | -0.036        | 0.939        | <b>0.821</b>  | <b>0.023</b>     |
| DG (36:3); [M+H-H2O]1+  | 0.036         | 0.939        | <b>0.857</b>  | <b>0.014</b>     |
| DG (36:2); [M+NH4]1+    | 0.179         | 0.702        | <b>0.857</b>  | <b>0.014</b>     |
| DG (36:2); [M+H-H2O]1+  | 0.071         | 0.879        | <b>0.857</b>  | <b>0.014</b>     |
| DG (35:5); [M+NH4]1+    | 0.630         | 0.129        | <b>0.775</b>  | <b>0.052</b>     |
| DG (35:3); [M+NH4]1+    | -0.450        | 0.310        | <b>-0.847</b> | <b>0.016</b>     |
| DG (35:2); [M+H-H2O]1+  | 0.643         | 0.119        | <b>0.821</b>  | <b>0.023</b>     |
| DG (34:3); [M+H-H2O]1+  | 0.179         | 0.702        | <b>0.929</b>  | <b>0.003</b>     |
| DG (34:2); [M+NH4]1+    | 0.286         | 0.535        | <b>0.821</b>  | <b>0.023</b>     |
| DG (34:2); [M+H-H2O]1+  | 0.143         | 0.760        | <b>0.964</b>  | <b>&lt;0.001</b> |
| DG (33:4); [M+H-H2O]1+  | <b>0.768</b>  | <b>0.044</b> | 0.556         | 0.195            |
| DG (33:1); [M+H-H2O]1+  | <b>0.857</b>  | <b>0.014</b> | 0.643         | 0.119            |
| DG (32:1); [M+H-H2O]1+  | <b>0.758</b>  | <b>0.119</b> | 0.643         | 0.119            |
| DG (30:1); [M+H-H2O]1+  | <b>0.857</b>  | <b>0.014</b> | 0.286         | 0.535            |
| DG (30:0); [M+H-H2O]1+  | <b>0.821</b>  | <b>0.023</b> | 0.179         | 0.702            |
| AD                      |               |              |               |                  |
| DG (44:11); [M+H-H2O]1+ | 0.342         | 0.265        | <b>0.514</b>  | <b>0.012</b>     |
| DG (36:4); [M+NH4]1+    | <b>-0.419</b> | <b>0.027</b> | -0.030        | 0.891            |
