# Supplementary material for: Lipidome Profiling in Childhood Obesity Compared to Adults: A Pilot Study
Source: MDPI journal article supplement (doi:10.3390/nu15153341), 2023-07-27
Supplement: s1 [file s1]

## **Lipidome profiling in childhood obesity compared to adults: a pilot study**

Andrea Soria-Gondek<sup>1\*</sup>, Pablo Fernández-García<sup>2\*</sup>, Lorena González<sup>3</sup>, Marjorie Reyes-Farias<sup>3,4</sup>, Marta Murillo<sup>5</sup>, Aina Valls<sup>5</sup>, Nativitat Real<sup>6</sup>, Silvia Pellitero<sup>7</sup>, Jordi Tarascó<sup>8</sup>, Benjamin Jenkins<sup>9</sup>, María Galán<sup>2</sup>, Francesc Villarroya<sup>10,11</sup>, Albert Koulman<sup>9</sup>, Patricia Corrales<sup>2</sup>, Antonio Vidal-Puig<sup>12†</sup>, Rubén Cereijo<sup>10,11, 13†</sup>, David Sánchez-Infantes<sup>2,3,11†</sup>

### **Contact info:**

David Sánchez-Infantes; Department of Health Sciences, Campus Alcorcón, University Rey Juan Carlos (URJC), E-28922 Madrid, Spain. Electronic address: david.sanchezi@urjc.es

### Supplementary file S4

Summary of the lifestyle behavioral changes in PE cohort after 6M of lifestyle recommendations, based on out-of-control snacking, sugar craving, introduction of healthy nutrients and physical exercise (2 to 3 times a week, at least 30 minutes). Healthy behaviors are highlighted in green while unhealthy behaviors are highlighted in red.

|    |        |                   | T0                      |               |                                   |          | T6                      |               |                                   |          |
|----|--------|-------------------|-------------------------|---------------|-----------------------------------|----------|-------------------------|---------------|-----------------------------------|----------|
| ID | Gender | Age (Age; Months) | Out of control snacking | Sugar craving | Introduction of healthy nutrients | Exercise | Out of control snacking | Sugar craving | Introduction of healthy nutrients | Exercise |
| 1  | Male   | 11;6              | no                      | no            | partial                           | no       | no                      | no            | partial                           | no       |
| 2  | Male   | 13                | yes                     | yes           | no                                | yes      | yes                     | yes           | no                                | yes      |
| 3  | Female | 14;5              | yes                     | yes           | yes                               | no       | no                      | no            | yes                               | yes      |
| 4  | Male   | 17;9              | no                      | no            | partial                           | no       | no                      | no            | partial                           | yes      |
| 5  | Female | 17;1              | yes                     | yes           | partial                           | no       | no                      | no            | partial                           | no       |
| 6  | Male   | 15;1              | no                      | yes           | no                                | no       | yes                     | no            | yes                               | yes      |
| 7  | Male   | 13;9              | no                      | no            | no                                | no       | no                      | no            | partial                           | no       |
| 8  | Male   | 10;2              | yes                     | no            | partial                           | no       | no                      | no            | partial                           | yes      |
| 9  | Female | 14;1              | yes                     | yes           | no                                | no       | no                      | no            | yes                               | yes      |
| 10 | Male   | 13;6              | yes                     | yes           | yes                               | no       | yes                     | yes           | no                                | yes      |
