# Supplementary material for: Lipidome Profiling in Childhood Obesity Compared to Adults: A Pilot Study
Source: MDPI journal article supplement (doi:10.3390/nu15153341), 2023-07-27
Supplement: s1 [file s1]

# Lipidome profiling in childhood obesity compared to adults: a pilot study

Andrea Soria-Gondek<sup>1\*</sup>, Pablo Fernández-García<sup>2\*</sup>, Lorena González<sup>3</sup>, Marjorie Reyes-Farias<sup>3,4</sup>, Marta Murillo<sup>5</sup>, Aina Valls<sup>5</sup>, Nativitat Real<sup>6</sup>, Silvia Pellitero<sup>7</sup>, Jordi Tarascó<sup>8</sup>, Benjamin Jenkins<sup>9</sup>, María Galán<sup>2</sup>, Francesc Villarroya<sup>10,11</sup>, Albert Koulman<sup>9</sup>, Patricia Corrales<sup>2</sup>, Antonio Vidal-Puig<sup>12†</sup>, Rubén Cereijo<sup>10,11, 13†</sup>, David Sánchez-Infantes<sup>2,3,11†</sup>

## Contact info:

David Sánchez-Infantes; Department of Health Sciences, Campus Alcorcón, University Rey Juan Carlos (URJC), E-28922 Madrid, Spain. Electronic address: david.sanchezi@urjc.es

## Supplementary file 3

The selected lipids for the correlation analyses in the PE(6M) vs PE(0M) and AD(6M) vs AD(0M) vs AD(6M), sorted by mainclass division and in decreasing order.

| PE                      |                                                                                  | AD                      |                                                                                                              |
|-------------------------|----------------------------------------------------------------------------------|-------------------------|--------------------------------------------------------------------------------------------------------------|
| Main class              | Lipids                                                                           | Main class              | Lipids                                                                                                       |
| Phosphatidylserines     | PS-O (38:5) [M+Na] <sup>1+</sup>                                                 | Glycerophosphocholines  | PC (37:3) [M+H] <sup>1+</sup> / PE (40:3) [M+H] <sup>1+</sup> / PA (42:4) [M+NH <sub>4</sub> ] <sup>1+</sup> |
|                         | PS-O (36:2) [M+Na] <sup>1+</sup>                                                 |                         | PC (42:8) [M+H] <sup>1+</sup>                                                                                |
|                         | PS-O (38:5) [M+H] <sup>1+</sup> / PG-P (38:6) [M+NH <sub>4</sub> ] <sup>1+</sup> |                         | PC (42:7) [M+H] <sup>1+</sup>                                                                                |
|                         | PS-O (36:3) [M+Na] <sup>1+</sup>                                                 |                         | PC (37:2) [M+H] <sup>1+</sup> / PE (40:2) [M+H] <sup>1+</sup> / PA (42:3) [M+NH <sub>4</sub> ] <sup>1+</sup> |
|                         | PS-O (36:3) [M+H] <sup>1+</sup> / PG-O (36:5) [M+NH <sub>4</sub> ] <sup>1+</sup> |                         | PC (40:5) [M+H] <sup>1+</sup>                                                                                |
|                         | PS-O (38:6) [M+H] <sup>1+</sup>                                                  |                         | PC (35:3) [M+H] <sup>1+</sup> / PE (38:3) [M+H] <sup>1+</sup> / PA (40:4) [M+NH <sub>4</sub> ] <sup>1+</sup> |
|                         | PS-O (34:0) [M+Na] <sup>1+</sup>                                                 |                         | PC-O (38:5) [M+H] <sup>1+</sup>                                                                              |
|                         | PS-O (36:1) [M+Na] <sup>1+</sup>                                                 | Triacylglycerols        | TG (53:2) [M+Na] <sup>1+</sup>                                                                               |
|                         | PS-O (38:4) [M+H] <sup>1+</sup> / PG-O (38:6) [M+NH <sub>4</sub> ] <sup>1+</sup> |                         | TG (47:5) [M+NH <sub>4</sub> ] <sup>1+</sup>                                                                 |
|                         | PS-O (40:4) [M+Na] <sup>1+</sup>                                                 |                         | TG (54:7) [M+Na] <sup>1+</sup>                                                                               |
|                         | PS-O (38:2) [M+Na] <sup>1+</sup>                                                 |                         | TG (56:6) [M+Na] <sup>1+</sup>                                                                               |
|                         | PS-O (40:6) [M+Na] <sup>1+</sup>                                                 |                         | TG (54:2) [M+Na] <sup>1+</sup>                                                                               |
|                         | PS (38:4) [M+Na] <sup>1+</sup>                                                   |                         | TG (58:8) [M+NH <sub>4</sub> ] <sup>1+</sup>                                                                 |
|                         | PS (40:7) [M+H] <sup>1+</sup> / PG (40:9) [M+NH <sub>4</sub> ] <sup>1+</sup>     | Phosphatidylserines     | PS (16:0) [M+H] <sup>1+</sup>                                                                                |
|                         | PS-P (42:2) [M+H] <sup>1+</sup>                                                  |                         | PS (41:1) [M+H] <sup>1+</sup> / PG (41:3) [M+NH <sub>4</sub> ] <sup>1+</sup>                                 |
|                         | PS (38:2) [M+Na] <sup>1+</sup>                                                   |                         | PS-O (41:0) [M+H] <sup>1+</sup>                                                                              |
|                         |                                                                                  |                         | PS (34:2) [M+Na] <sup>1+</sup>                                                                               |
| Sphingomyelins          | SM (41:0) [M+H] <sup>1+</sup>                                                    | Phosphatidylinositols   | PI (40:9) [M+Na] <sup>1+</sup>                                                                               |
|                         | SM (39:1) [M+H] <sup>1+</sup>                                                    |                         | PI-O (40:2) [M+NH <sub>4</sub> ] <sup>1+</sup>                                                               |
|                         | SM (34:2) [M+H] <sup>1+</sup>                                                    |                         | PI (43:0) [M+Na] <sup>1+</sup>                                                                               |
| Phosphatidylinositols   | PI-O (32:0) [M+H] <sup>1+</sup>                                                  | Diacylglycerols         | DG (42:7) [M+H-H <sub>2</sub> O] <sup>1+</sup>                                                               |
|                         | PI-O (41:0) [M+H] <sup>1+</sup>                                                  |                         | DG (44:9) [M+H-H <sub>2</sub> O] <sup>1+</sup>                                                               |
| Glycerophosphocholines  | PC-O-31:0) [M+H] <sup>1+</sup> / PE-O (34:0) [M+H] <sup>1+</sup>                 | Glycerophosphoglycerols | PG (44:0) [M+Na] <sup>1+</sup>                                                                               |
|                         | PC (43:4) [M+H] <sup>1+</sup>                                                    |                         | PG-O (34:1) [M+NH <sub>4</sub> ] <sup>1+</sup>                                                               |
| Glycerophosphoglycerols | PG (44:0) [M+H] <sup>1+</sup>                                                    | Glycerophosphates       | PA (40:0) [M+NH <sub>4</sub> ] <sup>1+</sup>                                                                 |
|                         | PG-O (28:0) [M+H] <sup>1+</sup>                                                  |                         | PA (39:4) [M+Na] <sup>1+</sup>                                                                               |
| Triacylglycerols        | TG (61:14) [M+NH <sub>4</sub> ] <sup>1+</sup>                                    |                         |                                                                                                              |

|                 |                       |                             |                     |
|-----------------|-----------------------|-----------------------------|---------------------|
|                 | TG (50:7) [M+NH4]1+   | Glycerophosphoethanolamines | PE-O (30:1) [M+H]1+ |
| Diacylglycerols | DG (36:6) [M+H-H2O]1+ |                             | LPE (18:4) [M+H]1+  |
|                 | DG (44:9) [M+H-H2O]1+ | Cholesterol esters          | CE (22:6) [M+NH4]1+ |
