# Supplementary material for: Lipidome Profiling in Childhood Obesity Compared to Adults: A Pilot Study
Source: Nutrients. 2023 Jul 27;15(15):3341. doi: 10.3390/nu15153341 (PMC10421258; doi:10.3390/nu15153341)
Supplement: Supplementary file 1 [file nutrients-15-03341-s001.zip]

Archive with 8 entries (8 files):
- Soria_Fernandez-LipidomeandChildhoodObesity-SupplementaryFileS1.pdf
- Soria_Fernandez-LipidomeandChildhoodObesity-SupplementaryFileS2.pdf
- Soria_Fernandez-LipidomeandChildhoodObesity-SupplementaryFileS3.pdf
- Soria_Fernandez-LipidomeandChildhoodObesity-SupplementaryFileS4.pdf
- Soria_Fernandez-LipidomeandChildhoodObesity-SupplementaryFileS5.pdf
- Soria_Fernandez-LipidomeandChildhoodObesity-SupplementaryFileS6.pdf
- Soria_Fernandez-LipidomeandChildhoodObesity-SupplementaryFileS7.pdf
- Soria_Fernandez-LipidomeandChildhoodObesity-SupplementaryFileS8.pdf
